# Supplementary material
Source: PubMed Central journal article supplement (PMC3957775)
Supplement: JCM.03195-13_zjm999093210so1.pdf [file JCM.03195-13_zjm999093210so1.pdf]

**Supplementary Table 1.** Genotype agreement for HPV-positive samples between HPV-Risk assay and GP5+/6+-PCR for the different samplings

| Sample type                   | Genotype HPV-Risk assay | Genotype GP5+/6+-PCR |          |           |              |                 |                 |                     |                                  | total      | Genotype agreement                                                                                                                |
|-------------------------------|-------------------------|----------------------|----------|-----------|--------------|-----------------|-----------------|---------------------|----------------------------------|------------|-----------------------------------------------------------------------------------------------------------------------------------|
|                               |                         | HPV16                | HPV18    | HPV Other | HPV16 and 18 | HPV16 and Other | HPV18 and Other | HPV16, 18 and Other | HPV X (not typable) <sup>b</sup> |            |                                                                                                                                   |
| Cervical scrapings            | HPV16                   | 33                   | -        | -         | -            | -               | -               | -                   | -                                | 33         | identical: 98/106 (92.5%; 95%CI 85.6-96.2)<br>compatible: 8/106 (7.5%; 95%CI 3.8-14.3)<br>discordant: n.a. <sup>a</sup>           |
|                               | HPV18                   | -                    | 2        | -         | -            | -               | 1               | -                   | -                                | 3          |                                                                                                                                   |
|                               | HPV Other               | -                    | -        | 50        | -            | 2               | -               | -                   | -                                | 52         |                                                                                                                                   |
|                               | HPV16 and 18            | 1                    | -        | -         | 2            | -               | -               | -                   | -                                | 3          |                                                                                                                                   |
|                               | HPV16 and Other         | 3                    | -        | 1         | -            | 8               | -               | -                   | -                                | 12         |                                                                                                                                   |
|                               | HPV18 and Other         | -                    | -        | -         | -            | -               | 3               | -                   | -                                | 3          |                                                                                                                                   |
|                               | <b>Total</b>            | <b>37</b>            | <b>2</b> | <b>51</b> | <b>2</b>     | <b>11</b>       | <b>4</b>        | <b>-</b>            | <b>-</b>                         | <b>106</b> |                                                                                                                                   |
| Self-collected lavage samples | HPV16                   | 8                    | -        | -         | -            | 2               | -               | -                   | 1                                | 11         | identical: 29/36 (80.6%; 95%CI 64.5-90.4)<br>compatible: 4/36 (11.1%; 95%CI 4.2-26.1)<br>discordant: 3/36 (8.3%; 95%CI 2.7-22.9)  |
|                               | HPV18                   | -                    | 3        | -         | -            | -               | -               | -                   | -                                | 3          |                                                                                                                                   |
|                               | HPV Other               | -                    | -        | 11        | -            | -               | -               | -                   | 2                                | 13         |                                                                                                                                   |
|                               | HPV16 and 18            | -                    | -        | -         | 1            | -               | -               | -                   | -                                | 1          |                                                                                                                                   |
|                               | HPV16 and Other         | -                    | -        | -         | -            | 5               | -               | -                   | -                                | 5          |                                                                                                                                   |
|                               | HPV18 and Other         | -                    | -        | 1         | -            | -               | 1               | 1                   | -                                | 3          |                                                                                                                                   |
|                               | <b>Total</b>            | <b>8</b>             | <b>3</b> | <b>12</b> | <b>1</b>     | <b>7</b>        | <b>1</b>        | <b>1</b>            | <b>3</b>                         | <b>36</b>  |                                                                                                                                   |
| Self-collected brush samples  | HPV16                   | 16                   | -        | 1         | -            | 2               | -               | -                   | 1                                | 20         | identical: 51/66 (77.3%; 95%CI 65.7-85.8)<br>compatible: 11/66 (16.7%; 95%CI 9.5-26.7)<br>discordant: 4/66 (6.0%; 95%CI 2.3-15.1) |
|                               | HPV18                   | -                    | 2        | -         | -            | -               | -               | -                   | 1                                | 3          |                                                                                                                                   |
|                               | HPV Other               | -                    | -        | 27        | -            | -               | -               | -                   | 2                                | 29         |                                                                                                                                   |
|                               | HPV16 and 18            | -                    | -        | -         | 1            | -               | -               | -                   | -                                | 1          |                                                                                                                                   |
|                               | HPV16 and Other         | 4                    | -        | 3         | -            | 2               | -               | -                   | -                                | 9          |                                                                                                                                   |
|                               | HPV18 and Other         | -                    | -        | 1         | -            | -               | 2               | -                   | -                                | 3          |                                                                                                                                   |
|                               | HPV16, 18, and Other    | -                    | -        | -         | -            | -               | -               | 1                   | -                                | 1          |                                                                                                                                   |
|                               | <b>Total</b>            | <b>20</b>            | <b>2</b> | <b>32</b> | <b>1</b>     | <b>4</b>        | <b>2</b>        | <b>1</b>            | <b>4</b>                         | <b>66</b>  |                                                                                                                                   |

<sup>a</sup>) n.a. = not applicable

**Supplementary Table 2A.** Intra-laboratory genotype agreement <sup>a</sup>

| Genotype HPV-Risk assay<br>Lab 1/test 1 | Genotype HPV-Risk assay Lab 1/test 2 |       |           |                     |                     | Total |
|-----------------------------------------|--------------------------------------|-------|-----------|---------------------|---------------------|-------|
|                                         | HPV16                                | HPV18 | Other HPV | HPV16 and Other HPV | HPV18 and Other HPV |       |
| HPV16                                   | 31                                   | -     | -         | -                   | -                   | 31    |
| HPV18                                   | -                                    | 9     | -         | -                   | -                   | 9     |
| Other HPV                               | -                                    | -     | 80        | -                   | -                   | 80    |
| HPV16 and Other HPV                     | -                                    | -     | -         | 23                  | -                   | 23    |
| HPV18 and Other HPV                     | -                                    | -     | 1         | -                   | 11                  | 12    |
| <b>Total</b>                            | 31                                   | 9     | 81        | 23                  | 11                  | 155   |

<sup>a</sup>) Identical 154/155 (99.4%); compatible 1/155 (0.6%)

**Supplementary Table 2B.** Inter laboratory genotype agreement <sup>a</sup>

| Genotype HPV-Risk assay<br>Lab 1/test 1 | Genotype HPV-Risk assay Lab 2 |       |           |              |                     |                     | Total |
|-----------------------------------------|-------------------------------|-------|-----------|--------------|---------------------|---------------------|-------|
|                                         | HPV16                         | HPV18 | Other HPV | HPV16 and 18 | HPV16 and Other HPV | HPV18 and Other HPV |       |
| HPV16                                   | 28                            | -     | -         | -            | 1                   | -                   | 29    |
| HPV18                                   | -                             | 8     | -         | 1            | -                   | -                   | 9     |
| Other HPV                               | -                             | -     | 75        | -            | -                   | -                   | 75    |
| HPV16 and Other HPV                     | -                             | -     | -         | -            | 22                  | -                   | 22    |
| HPV18 and Other HPV                     | -                             | 1     | 1         | -            | -                   | 8                   | 10    |
| <b>Total</b>                            | 28                            | 9     | 76        | 1            | 23                  | 8                   | 145   |

<sup>a</sup>) Identical 141/145 (97.2%); compatible 4/145 (2.8%)

**Supplementary Table 3A.** Genotype agreement of HPV-Risk assay between self-collected cervico-vaginal lavage specimen and concomitant clinician-taken scraping <sup>a</sup>

| Genotype HPV-Risk assay<br>Lavage self-sample | Genotype HPV-Risk assay clinician-taken scraping |       |           |                     |                     |              | Total |
|-----------------------------------------------|--------------------------------------------------|-------|-----------|---------------------|---------------------|--------------|-------|
|                                               | HPV16                                            | HPV18 | Other HPV | HPV16 and Other HPV | HPV18 and Other HPV | HPV16 and 18 |       |
| HPV16                                         | 10                                               | -     | -         | -                   | -                   | -            | 10    |
| HPV18                                         | -                                                | 3     | -         | -                   | -                   | -            | 3     |
| Other HPV                                     | -                                                | -     | 11        | -                   | -                   | -            | 11    |
| HPV16 and Other HPV                           | -                                                | -     | -         | 5                   | -                   | -            | 5     |
| HPV18 and Other HPV                           | -                                                | -     | 1         | -                   | 2                   | -            | 3     |
| HPV16 and 18                                  | -                                                | -     | -         | -                   | -                   | 1            | 1     |
| <b>Total</b>                                  | 10                                               | 3     | 12        | 5                   | 2                   | 1            | 33    |

<sup>a</sup>) Identical 32/33 (97.0%); compatible 1/33 (3.0%)

**Supplementary Table 3B.** Genotype agreement of HPV-Risk assay between self-collected vaginal brush specimen and concomitant clinician-taken scraping <sup>a</sup>

| Genotype HPV-Risk assay<br>Brush self-sample | Genotype HPV-Risk assay clinician-taken scraping |       |           |                     |                     |              |                          | Total |
|----------------------------------------------|--------------------------------------------------|-------|-----------|---------------------|---------------------|--------------|--------------------------|-------|
|                                              | HPV16                                            | HPV18 | Other HPV | HPV16 and Other HPV | HPV18 and Other HPV | HPV16 and 18 | HPV16, 18, and Other HPV |       |
| HPV16                                        | 16                                               | -     | -         | 3                   | -                   | -            | -                        | 19    |
| HPV18                                        | -                                                | 2     | -         | -                   | -                   | -            | -                        | 2     |
| Other HPV                                    | -                                                | -     | 29        | 1                   | -                   | -            | -                        | 30    |
| HPV16 and Other HPV                          | 1                                                | -     | 3         | 5                   | -                   | -            | -                        | 9     |
| HPV18 and Other HPV                          | -                                                | -     | -         | -                   | 3                   | -            | -                        | 3     |
| HPV16 and 18                                 | -                                                | -     | -         | -                   | -                   | 1            | -                        | 1     |
| HPV16, 18, and Other HPV                     | -                                                | -     | -         | -                   | -                   | -            | 1                        | 1     |
| <b>Total</b>                                 | 17                                               | 2     | 32        | 9                   | 3                   | 1            | 1                        | 65    |

<sup>a</sup>) Identical 57/65 (87.7%); compatible 8/65 (12.3%)
